# Supplementary material for: Facile construction of metal–organic frameworks/topological insulator heterostructure for photothermal catalytic CO2 reduction
Source: Royal Society of Chemistry journal article supplement (doi:10.1039/d3tc04332k), 2024-01-01
Supplement: d3tc04332k1.pdf [file d3tc04332k1.pdf]

## Supporting Information

### Facile Construction of Metal–Organic Framework/Topological Insulator

#### Heterostructure for Photothermal Catalytic CO<sub>2</sub> Reduction

Jing Sun<sup>a</sup>, Xunfeng Yuan<sup>a, c</sup>, Baoying Liu<sup>a</sup>, Shang Ma<sup>b</sup>, Chengfang Qiao<sup>b\*</sup>

<sup>a</sup>School of Electronic Information and Electrical Engineering, Shangluo University,  
Shangluo 726000, P. R. China

<sup>b</sup>Shaanxi Key Laboratory of Comprehensive Utilization of Tailings Resources, College  
of Chemical Engineering and Modern Materials, Shangluo University, Shangluo  
726000, P. R. China

<sup>c</sup>Research Center of Artificial Intelligence of Shangluo, Shangluo University, Shangluo  
726000, P. R. China

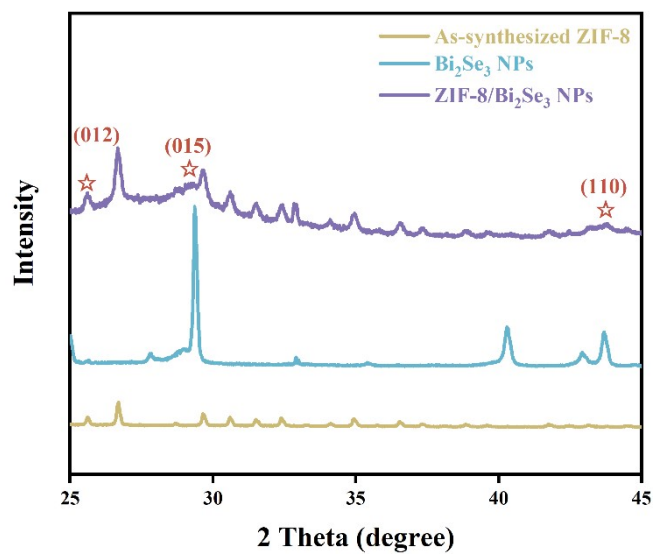

Figure S1. PXRD patterns of ZIF-8, Bi<sub>2</sub>Se<sub>3</sub> NPs and ZIF-8/Bi<sub>2</sub>Se<sub>3</sub> NPs.

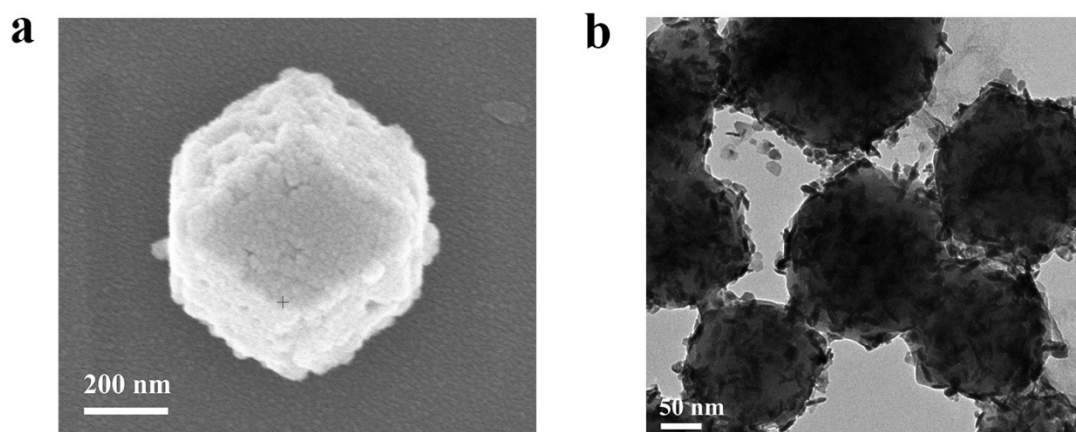

Figure S2. (a) FE-SEM and (b) TEM images of ZIF-8/Bi<sub>2</sub>Se<sub>3</sub> NPs.

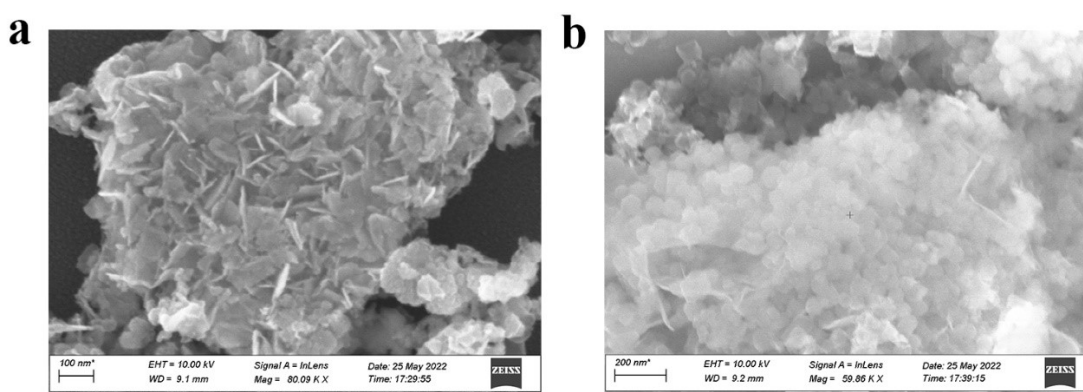

Figure S3. FE-SEM images of (a) Bi<sub>2</sub>Se<sub>3</sub> NSs and (b) ZIF-8/Bi<sub>2</sub>Se<sub>3</sub> NSs.

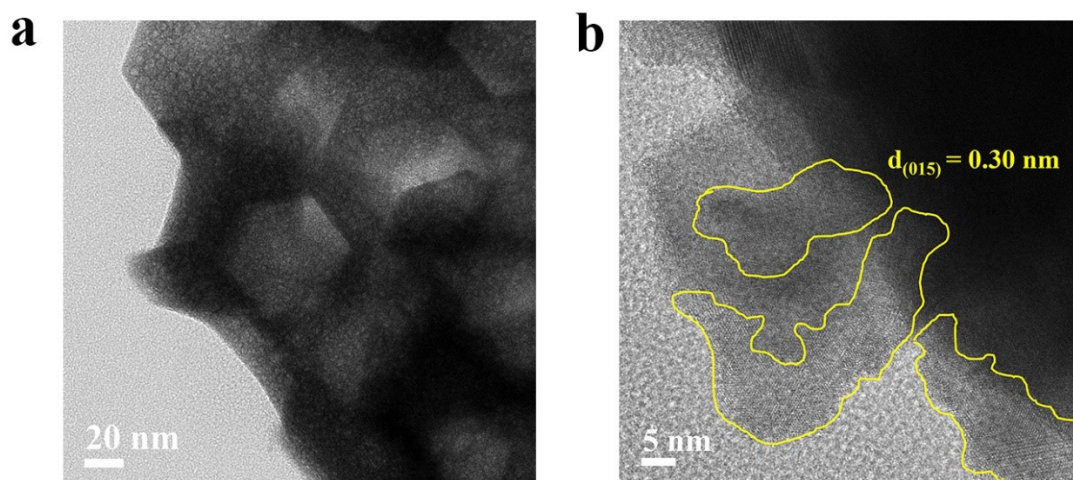

Figure S4. (a) and (b) HRTEM images of ZIF-8/Bi<sub>2</sub>Se<sub>3</sub> NSs.

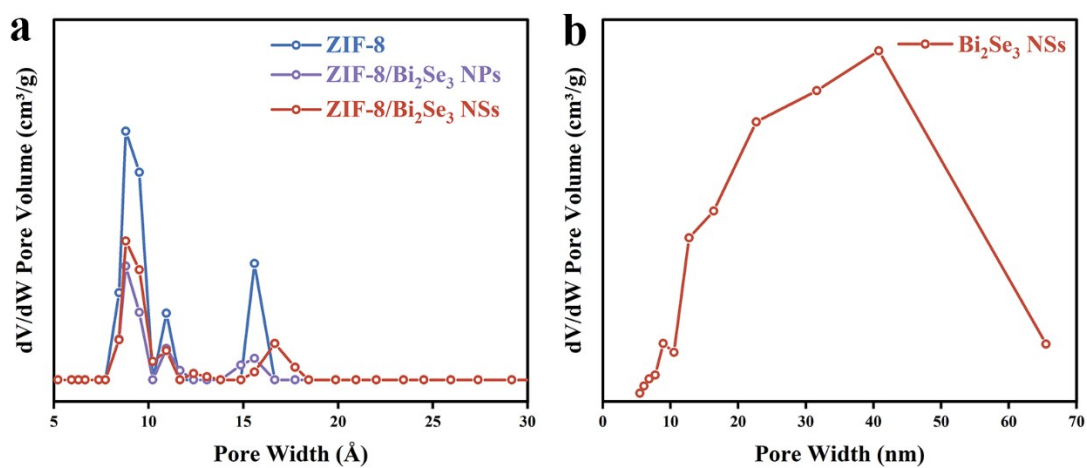

Figure S5. Pore size distribution of (a) ZIF-8, ZIF-8/Bi<sub>2</sub>Se<sub>3</sub> NPs and ZIF-8/Bi<sub>2</sub>Se<sub>3</sub>

NSs and (b) Bi<sub>2</sub>Se<sub>3</sub> NSs.

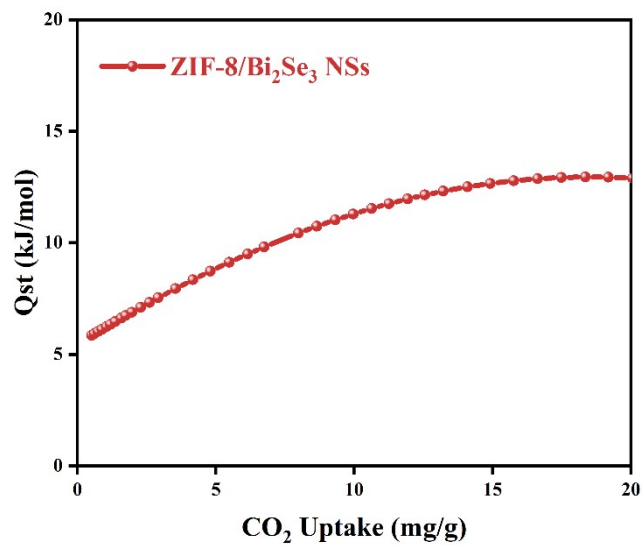

Figure S6. Heat of adsorption (Qst) of CO<sub>2</sub> for ZIF-8/Bi<sub>2</sub>Se<sub>3</sub> NSs.

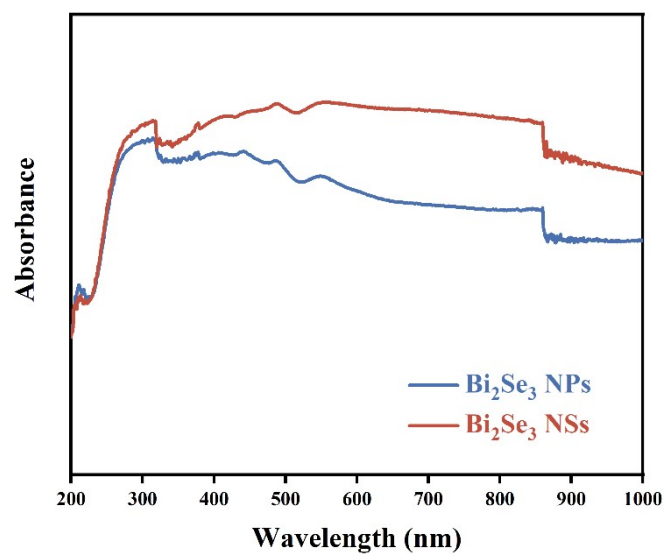

Figure S7. UV-Vis-NIR DRS spectra of Bi<sub>2</sub>Se<sub>3</sub> NPs and Bi<sub>2</sub>Se<sub>3</sub> NSs.

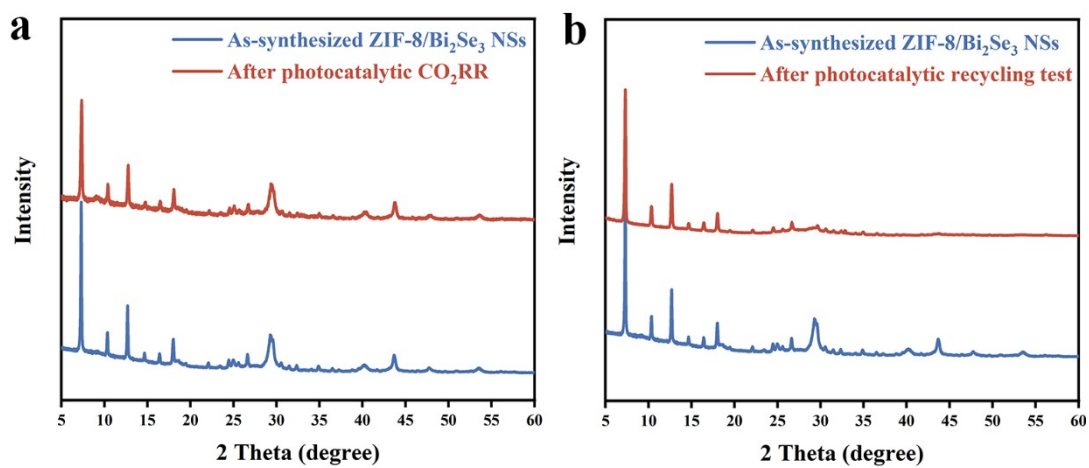

Figure S8. PXRD patterns of as-synthesized ZIF-8/Bi<sub>2</sub>Se<sub>3</sub> NSs catalyst before and after (a) photocatalytic CO<sub>2</sub>RR and (b) recycling experiment.

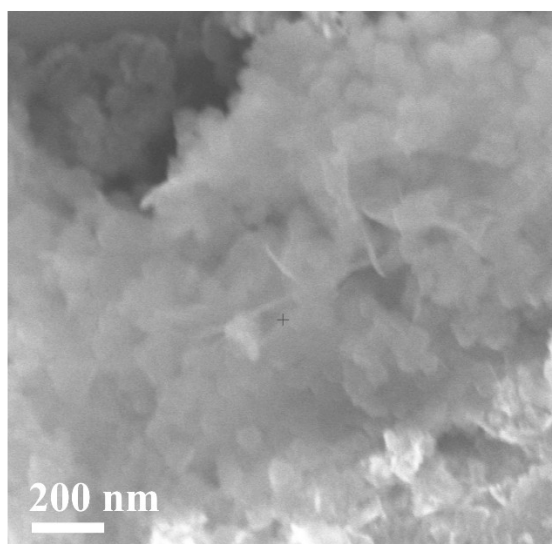

Figure S9. FE-SEM image of ZIF-8/Bi<sub>2</sub>Se<sub>3</sub> NSs catalyst after photocatalytic CO<sub>2</sub>RR recycling experiment.

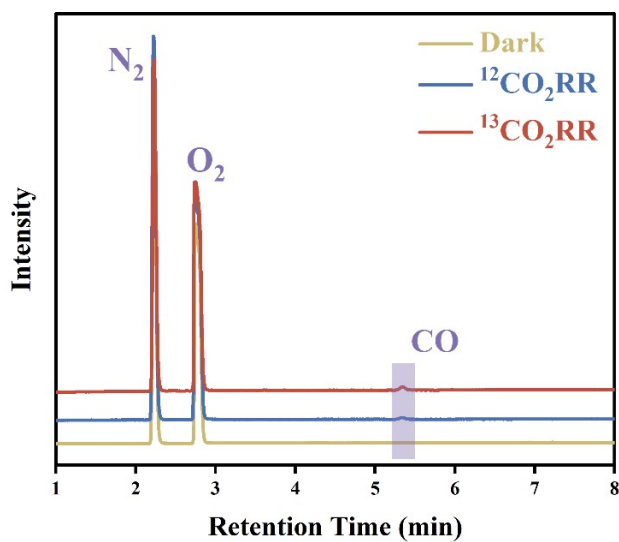

Figure S10. GC spectra of reaction gas in  $^{12}\text{CO}_2\text{RR}$  and  $^{13}\text{CO}_2\text{RR}$ .

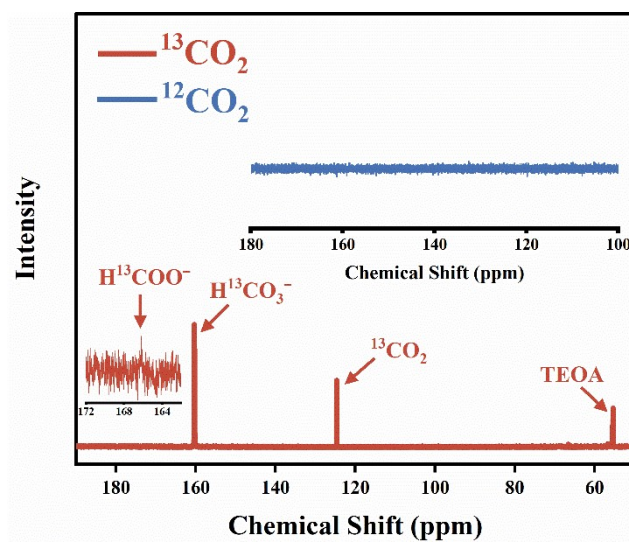

Figure S11.  $^{13}\text{C}$  NMR spectra of reaction liquid in  $^{12}\text{CO}_2\text{RR}$  and  $^{13}\text{CO}_2\text{RR}$ .
